# Supplementary material
Source: Royal Society of Chemistry journal article supplement (doi:10.1039/d6sm00370b)
Supplement: d6sm00370b1.pdf [file d6sm00370b1.pdf]

### Supporting Information

## Non-Native Square Packing and Structural Arrangement of Ultrahigh Molecular Weight Diblock Copolymer from One-step Solvent Vapor Annealing

Yuheng Wang<sup>a</sup>, Akhila Joy<sup>a</sup>, Natalia Hnatchuk<sup>a</sup>, Tejal Pawale<sup>a</sup>, Tosin Ogunrinola<sup>b</sup>, Vasanta Gurung<sup>a</sup>, Diana Berman<sup>a</sup>, Ying Bao<sup>b</sup>, Xiao Li<sup>a\*</sup>

<sup>a</sup>Materials Science and Engineering Department, University of North Texas, 3940 North Elm Str, Denton, TX 76209, USA

<sup>b</sup>Department of Chemistry, Western Washington University, 516 high street, Bellingham, Washington, 98225, the United States.

\* Corresponding author: Xiao.Li@unt.edu

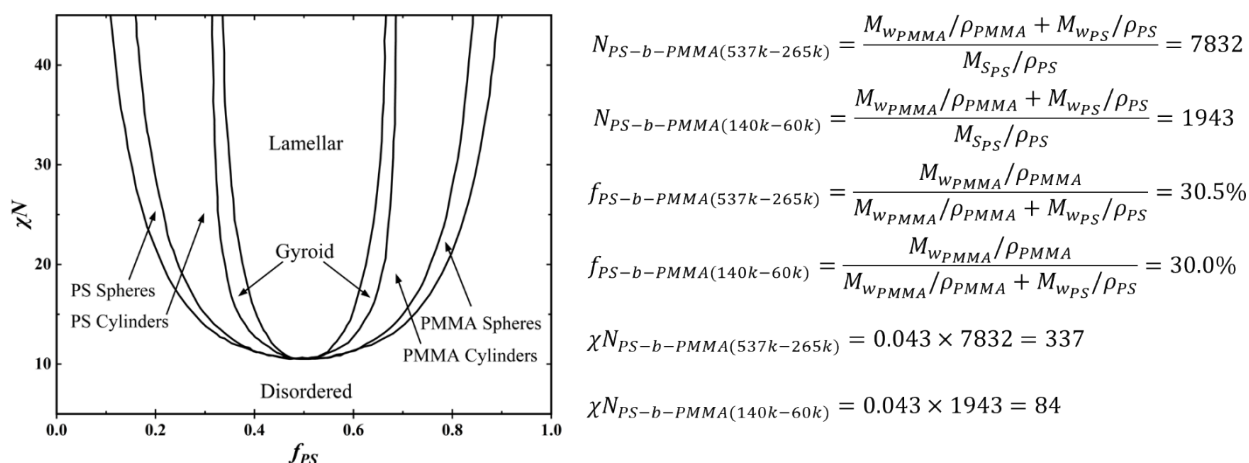

**Figure S1.** A typical phase diagram of PS-*b*-PMMA diblock copolymer and basic parameter of two PS-*b*-PMMA block-copolymer used in this study

$$\delta_{PS} = 18.6 \text{MPa}^{0.5}$$

$$\delta_{PMMA} = 19.0 \text{MPa}^{0.5}$$

$$\chi = \frac{V_{solvent}}{RT} (\delta_{solvent} - \delta_{polymer})^2 + 0.34$$

| Solvent    | VP(kPa) at 25°C | $\delta_{solvent}(\text{MPa}^{0.5})$ | $V_s(\text{ml/mol})$ | $\chi_{PS-S}$ | $\chi_{PMMA-S}$ |
|------------|-----------------|--------------------------------------|----------------------|---------------|-----------------|
| THF        | 21.6            | 19.5                                 | 81.3                 | 0.34          | 0.88            |
| Acetone    | 30.7            | 19.9                                 | 73.7                 | 1.1           | 0.29            |
| Chloroform | 26.7            | 18.9                                 | 80.2                 | 0.34          | 0.34            |
| PGMEA      | 0.5             | 17.4                                 | 136                  | 0.42          | 0.48            |
| TCE        | 9.1             | 17.5                                 | 89.7                 | 0.39          | 0.43            |

**Table S1.** Polymer-solvent Flory-Huggins interaction parameters.

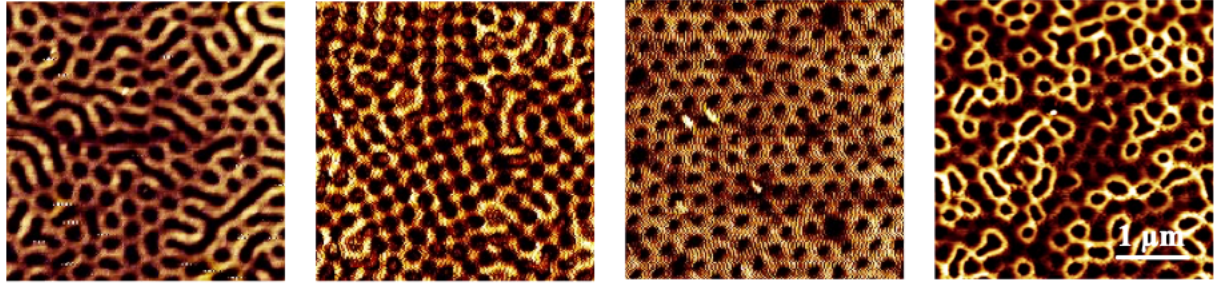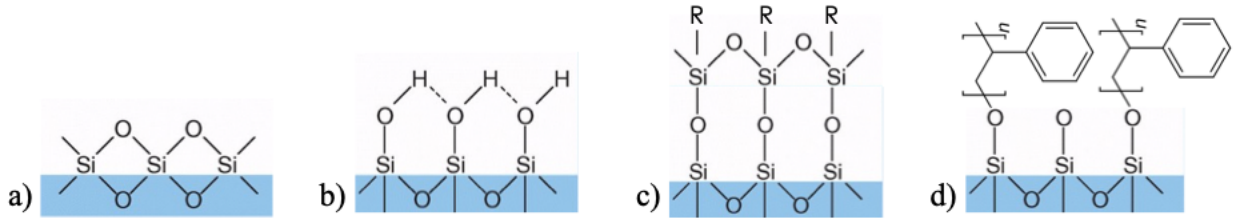

**Figure S2.** AFM images of SVA 110 nm PS-b-PMMA film with the different silicon substrate treatments: (a) IPA rinsed, (b) piranha cleaned, (c) OTS modified, (d) grafted PS-brush.

### Calculation of the Natural Period $L_0$ of PS-b-PMMA (537k-265k) & (140k-60k)

Using strong-segregation theory (SST) [1-3], the equilibrium natural period  $L_0$  of microphase-separated diblock copolymer is set by the balance between chain stretching and interfacial segregation energies, which yields the SST scaling form:

$$L_0 \approx CaN^{\frac{2}{3}}\chi^{\frac{1}{6}}$$

Where  $a$  is an effective statistical segment length that maps the coarse-grained Gaussian-chain description to a real-space length scale,  $N$  is the total degree of polymerization,  $\chi$  is the Flory-Huggins interaction parameter for PS/PMMA, and  $C$  is an order-unity prefactor that weakly captures morphology- and composition-dependent geometric factors that are not resolved in the scaling law. For PS-b-PMMA (537k-265k), the volume fraction  $f = 30.5\%$ , consistent with PMMA cylinders in a PS matrix. An effective value  $a = 0.695$  nm was adopted for ultra-high molecular weight as a representative segment-length scale for PS/PMMA to convert the SST scaling relation into a dimensional estimate of  $L_0$ . The prefactor was set to  $C \approx 1$  for it is expected to be for unity and the present calculation is intended as a first order estimate for thickness normalization rather than a parameter-free prediction. substituting these values yields:

$$L_{0(537k-265k)} \approx 0.695 \times 7835^{\frac{2}{3}} \times 0.043^{\frac{1}{6}} \text{ nm} \approx 163 \text{ nm}$$

Similarly, for PS-*b*-PMMA (140k-*b*-60k), the volume fraction  $f = 30.5\%$ , consistent with PMMA cylinders in a PS matrix. The same values of  $a = 0.695$  nm and  $C \approx 1$  were used for calculation consistency. Substituting values of PS-*b*-PMMA (140k-60k) system, the estimated natural period is:

$$L_{0(140k-60k)} \approx 0.695 \times 1943^{\frac{2}{3}} \times 0.043^{\frac{1}{6}} \text{ nm} \approx 64 \text{ nm}$$

So, the value  $L_{0(537k-265k)} \approx 163 \text{ nm}$  and  $L_{0(140k-60k)} \approx 64 \text{ nm}$  are used to normalize film thickness as  $t/L_0$  in the subsequent analysis.

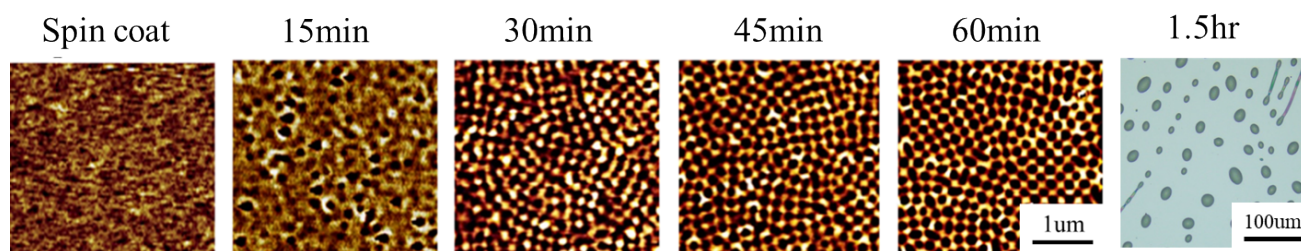

**Figure S3.** AFM images of the structure evolution of 110 nm thick PS-*b*-PMMA film during SVA.

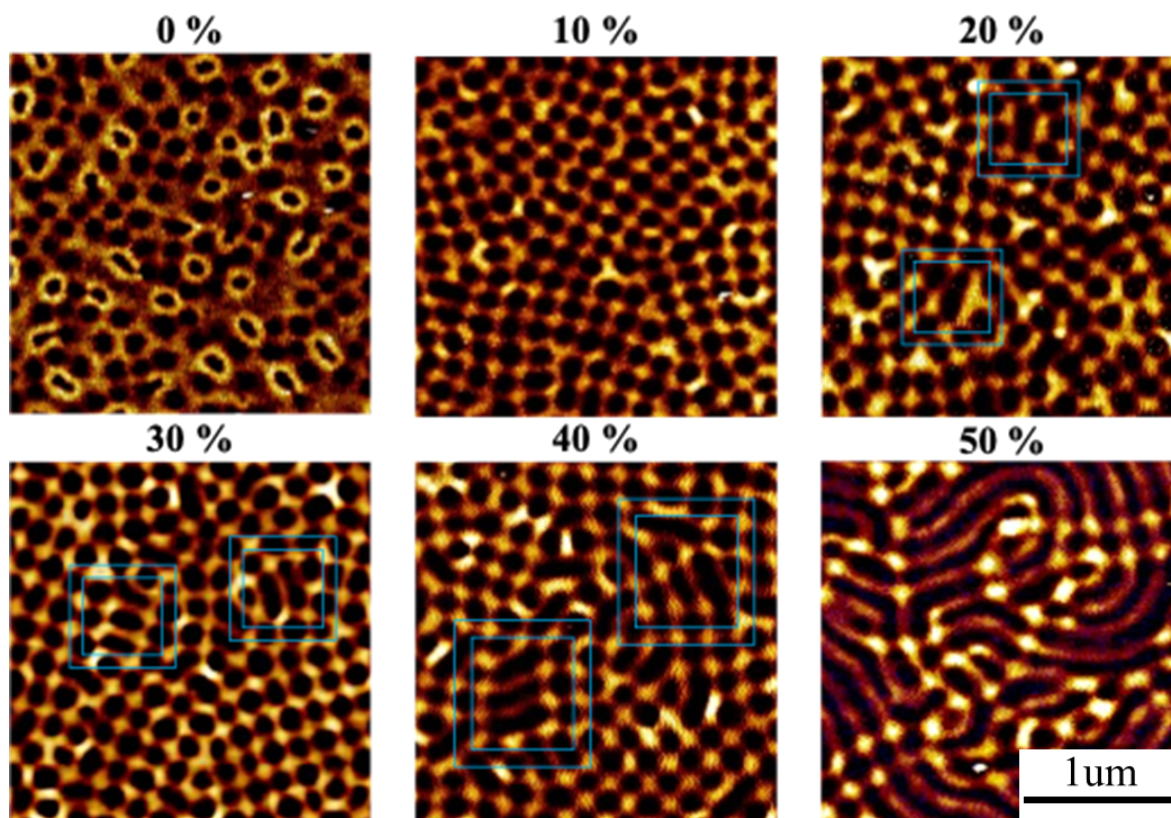

**Figure S4.** Enlarged AFM images of 110nm 1-hour SVA PS-*b*-PMMA film with 0-50 wt% of PMMA homopolyer.

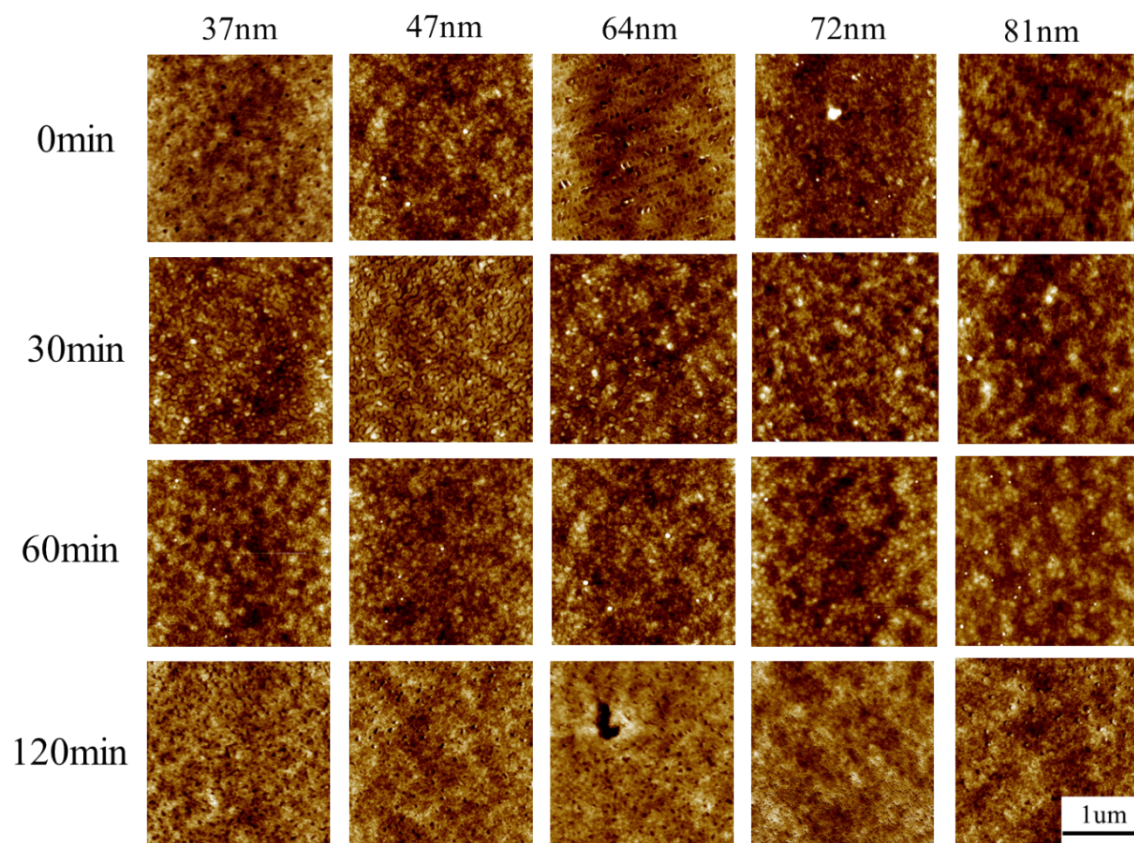

**Figure S5. AFM height images of PS-b-PMMA (140k-60k) structural evolution.** Films with different thicknesses (37nm-81nm) correspond to 0.57-1.3 $L_0$  range after solvent vapor annealing (SVA) in saturated TCE vapor for varying times, all AFM images are shown at same scale.

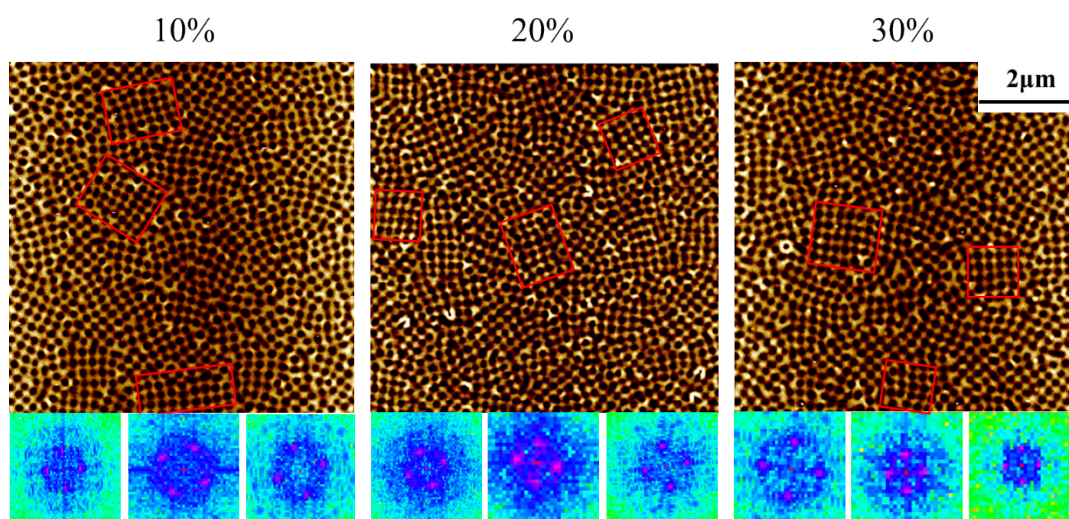

**Figure S6. Representative square array pattern formed by 10-30% homopolymer addition.** The 2D FFT pattern corresponds to highlighted square array domains.

## Reference

- 1 G. Fredrickson, *The Equilibrium Theory of Inhomogeneous Polymers*, DOI:10.1093/acprof:oso/9780198567295.001.0001.
- 2 M. W. Matsen and M. Schick, *Phys. Rev. Lett.*, 1994, **72**, 2660–2663.
- 3 F. S. Bates and G. H. Fredrickson, *Annu. Rev. Phys. Chem.*, 1990, **41**, 525–557.
